# Supplementary material for: Urchin-like NiCoP coated with a carbon layer as a high-performance electrode for all-solid-state asymmetric supercapacitors
Source: Royal Society of Chemistry journal article supplement (doi:10.1039/d0ma00058b), 2020-01-01
Supplement: d0ma00058b1.pdf [file d0ma00058b1.pdf]

# Electronic Supplementary Information (ESI)

## Urchin-like NiCoP coated with carbon layer as high performance electrodes for all-solid-state asymmetric supercapacitors

Jingzhou Ling<sup>a</sup>, Hanbo Zou<sup>a,\*</sup>, Wei Yang<sup>b</sup>, Shengzhou Chen<sup>b,\*\*</sup>

- a. School of Chemistry and Chemical Engineering, Guangzhou University, Guangzhou, China
- b. Guangzhou Key Laboratory for New Energy and Green Catalysis, Guangzhou University, Guangzhou, China

---

\* Corresponding author. Tel: +86 20 39366906; Fax: +86 20 39366902.

\*\* Corresponding author. Tel: +86 20 39339685; Fax: +86 20 39339685.

E-mail address: [zouhb@gzhu.edu.cn](mailto:zouhb@gzhu.edu.cn) (H. B. Zou)  
[szchen@gzhu.edu.cn](mailto:szchen@gzhu.edu.cn) (S. Z. Chen)

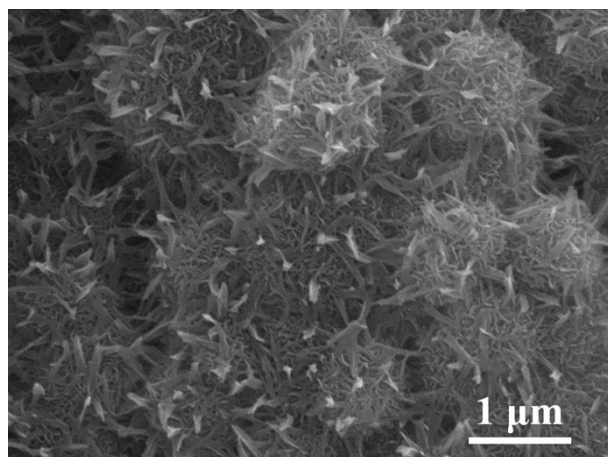

**Fig. S1.** High magnification SEM image of NiCo-ULAs precursor obtained from hydrothermal reaction for 2 h.

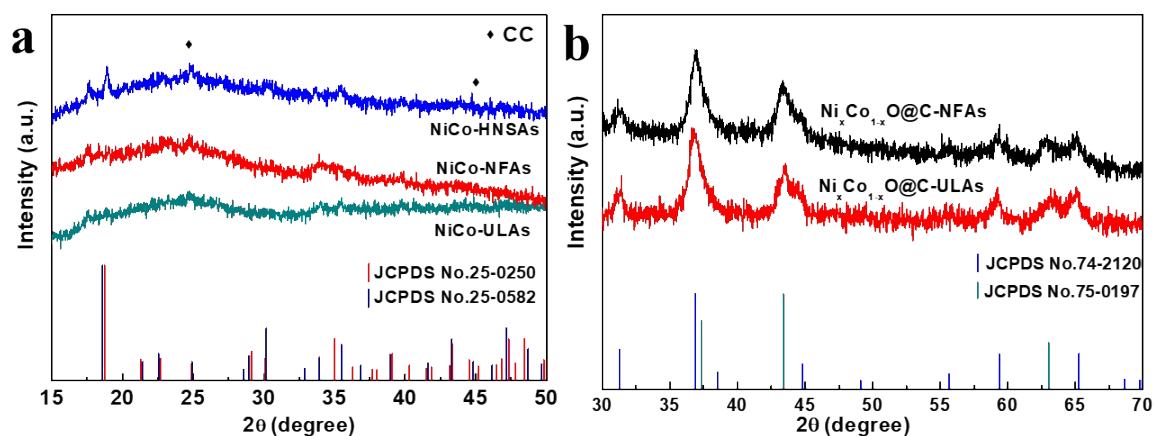

**Fig. S2.** (a) XRD patterns of as-prepared NiCo-NFAs, NiCo-ULAs and NiCo-HNSAs. The diffraction peaks of the three XRD patterns can be indexed to  $\text{Co}_2\text{O}_4 \cdot 2\text{H}_2\text{O}$ . (b) XRD patterns of  $\text{Ni}_x\text{Co}_{1-x}\text{O}@C\text{-NFAs}$  and  $\text{Ni}_x\text{Co}_{1-x}\text{O}@C\text{-ULAs}$ .

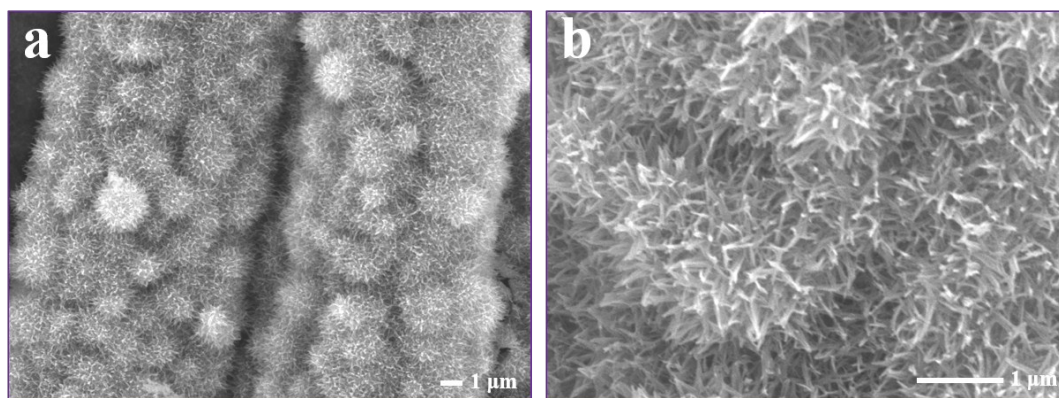

**Fig. S3.** (a) Low and (b) high magnification SEM images of  $\text{Ni}_x\text{Co}_{1-x}\text{O}@C\text{-ULAs}$ .

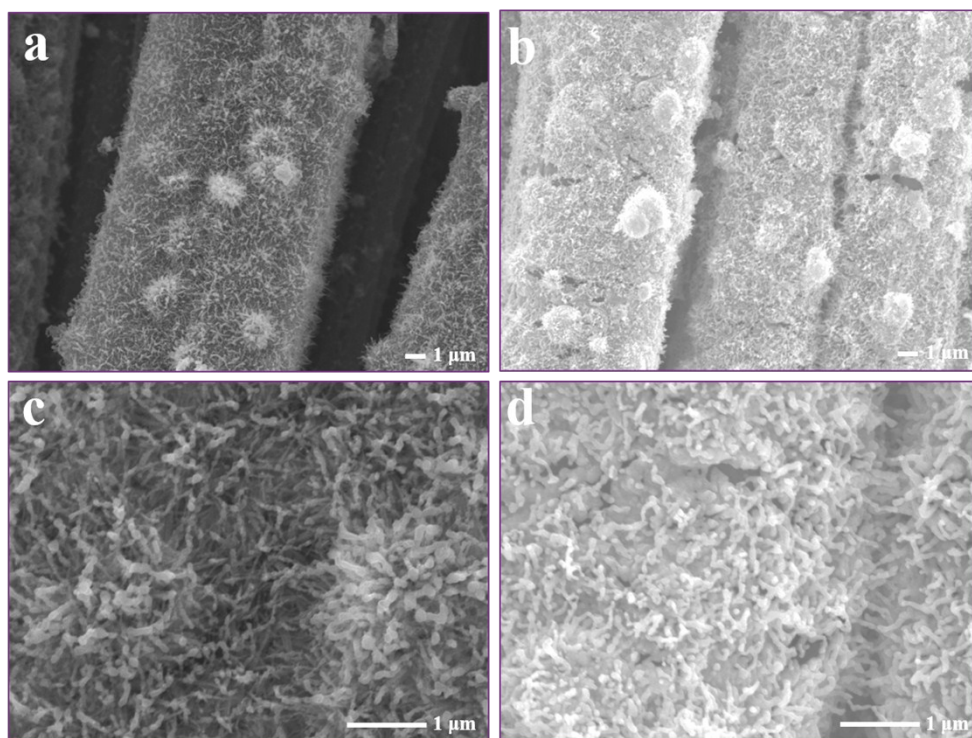

**Fig. S4.** SEM images of the hybrids (phosphides coated with carbon) obtained with the various glucose concentration of (a, c) 0.03 M and (b, d) 0.04 M.

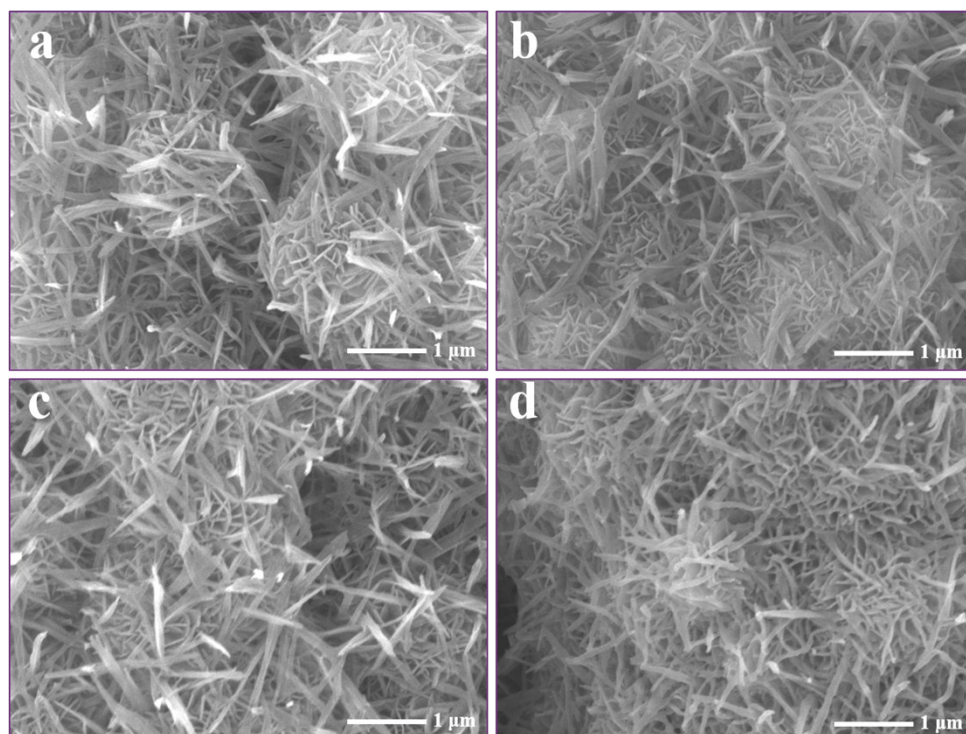

**Fig. S5.** SEM images of (a) NiCo-NFAs, (b) NiCoP-NFAs, (c) Ni<sub>x</sub>Co<sub>1-x</sub>O@C-NFAs, and (d) NiCoP@C-NFAs.

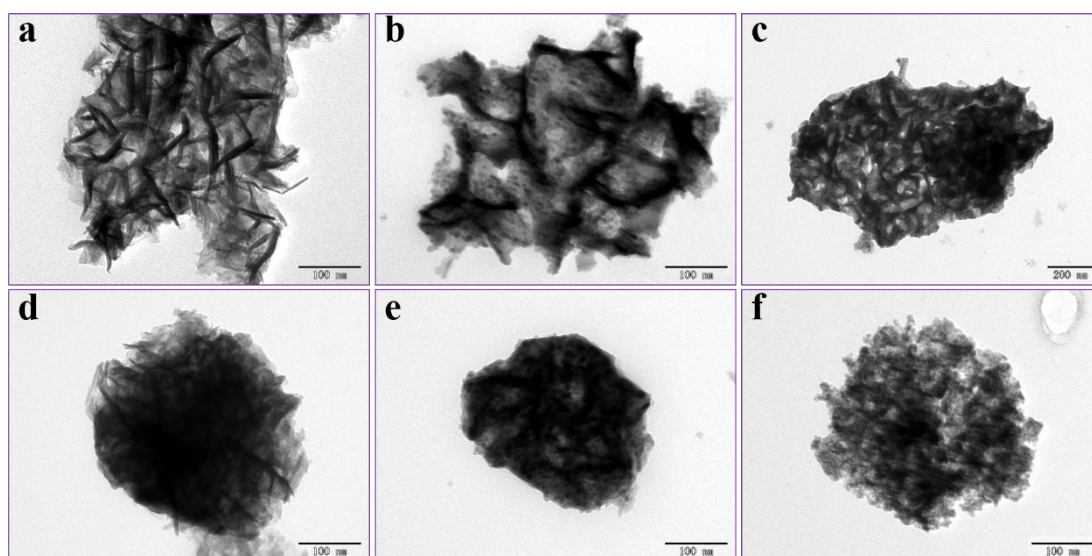

**Fig. S6.** TEM images of (a) NiCo-NFAs, (b) NiCoP-NFAs, (c) NiCoP@C-NFAs, (d) NiCo-ULAs, (e) NiCoP-ULAs, and (f) NiCoP@C-ULAs.

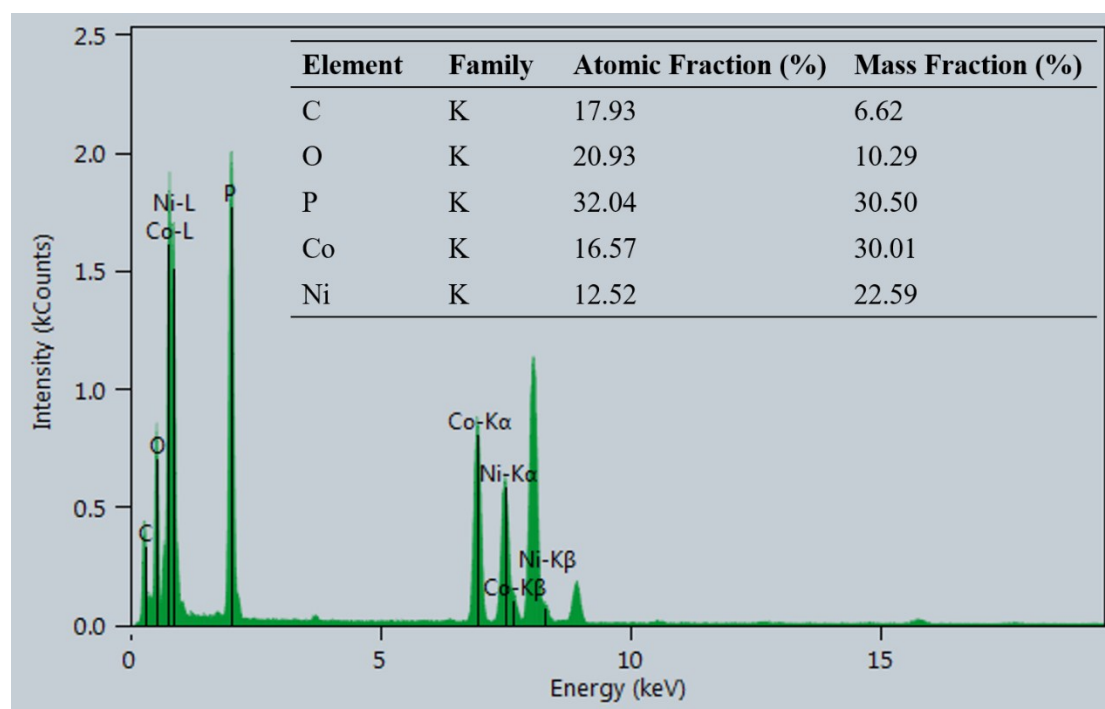

**Fig. S7.** EDX spectrum of NiCoP@C-ULAs, and the inset of corresponding the element content.



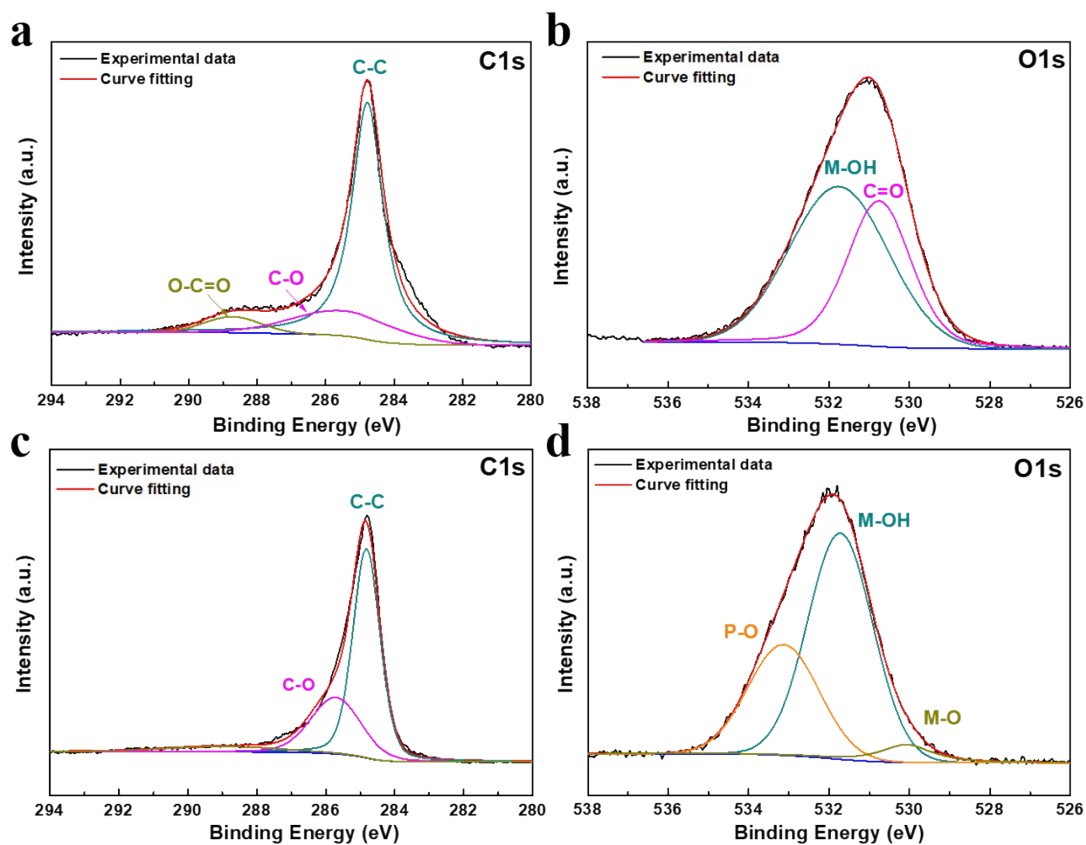

Fig. S8. High-resolution XPS spectra of C1s and O1s for (a, b) NiCo-ULAs, and (c, d) NiCoP@C-ULAs.

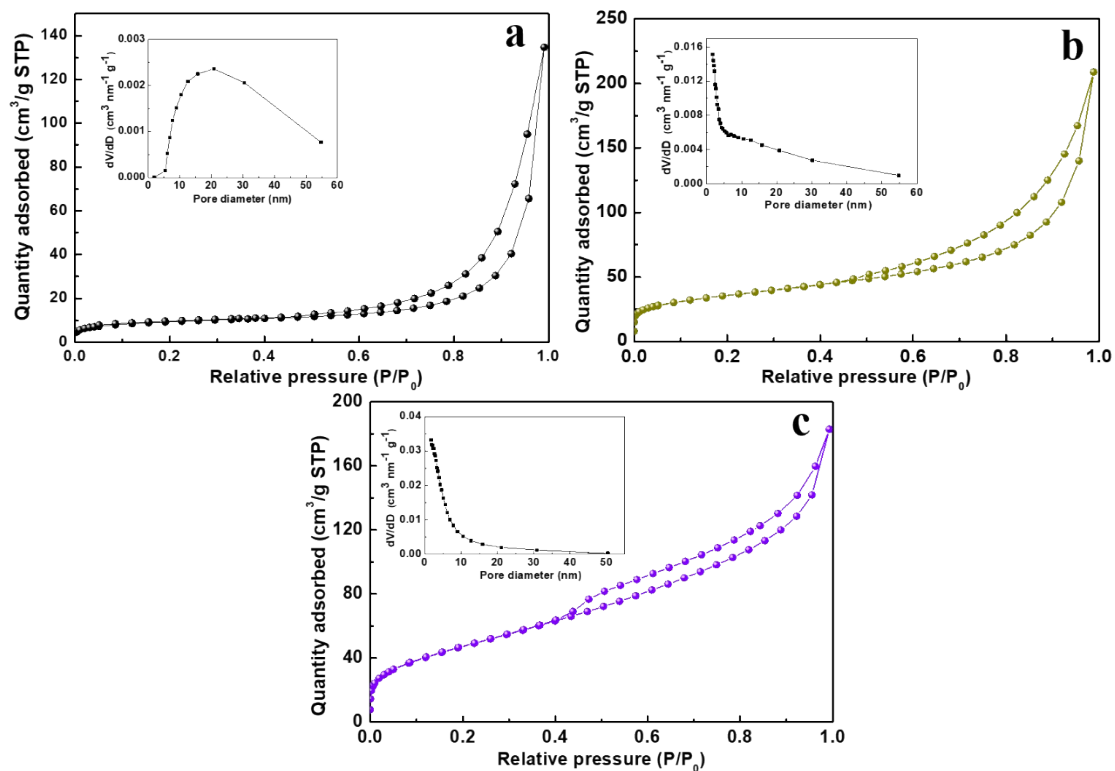

Fig. S9. Nitrogen adsorption-desorption isotherms of the (a) NiCo-NFAs, (b) NiCoP-NFAs, and (c) NiCoP@C-NFAs. Insets of (a) and (b), and (c) are their pore size distributions.

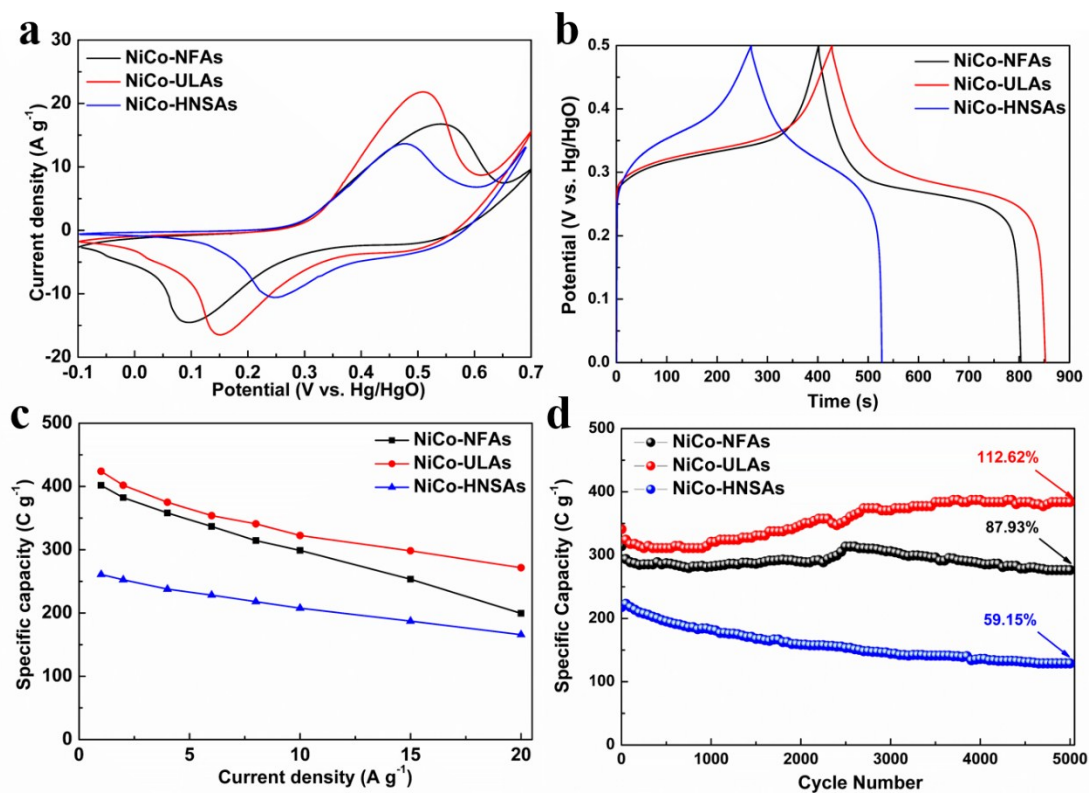

**Fig. S10.** Electrochemical performance of NiCo-NFAs, NiCo-ULAs, and NiCo-HNSAs precursors. (a) CV curves at a scan rate of  $10 \text{ mV s}^{-1}$ , (b) GCD curves at a current density of  $1 \text{ A g}^{-1}$ , (c) rate performance, and (d) cycling performance at a constant current density of  $8 \text{ A g}^{-1}$ .

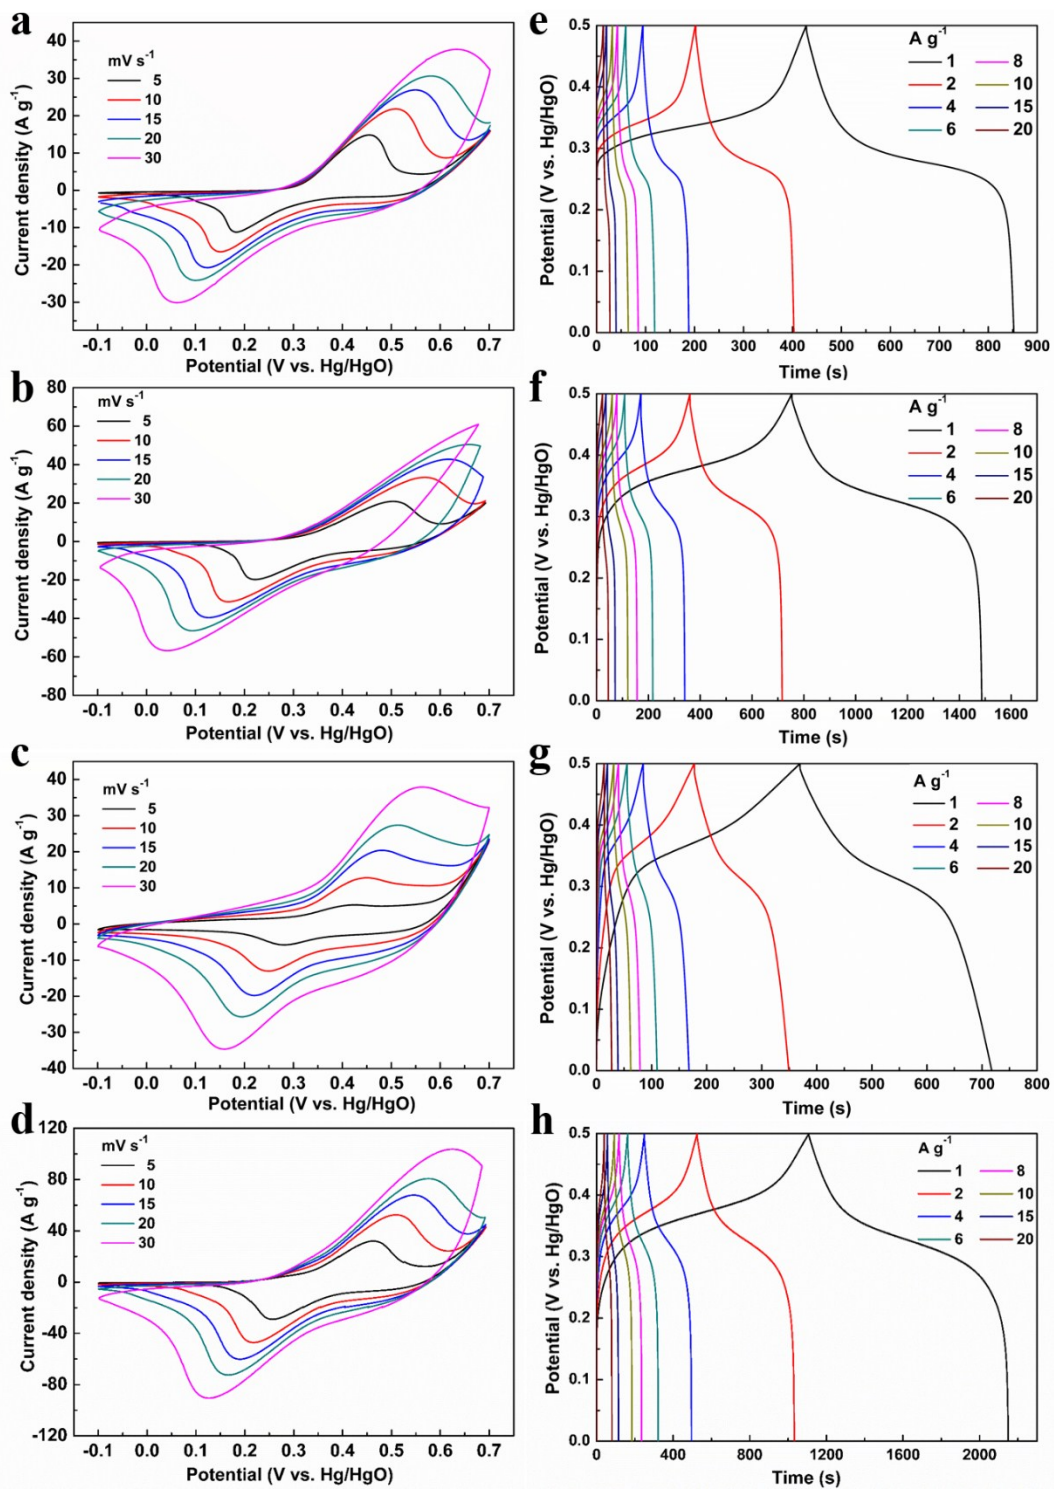

**Fig. S11.** (a-d) CV curves with different sweep rates, (e-h) GCD curves with different current densities of NiCo-ULAs, NiCoP-ULAs, Ni<sub>x</sub>Co<sub>1-x</sub>O@C-ULAs, and NiCoP@C-ULAs electrodes, respectively.

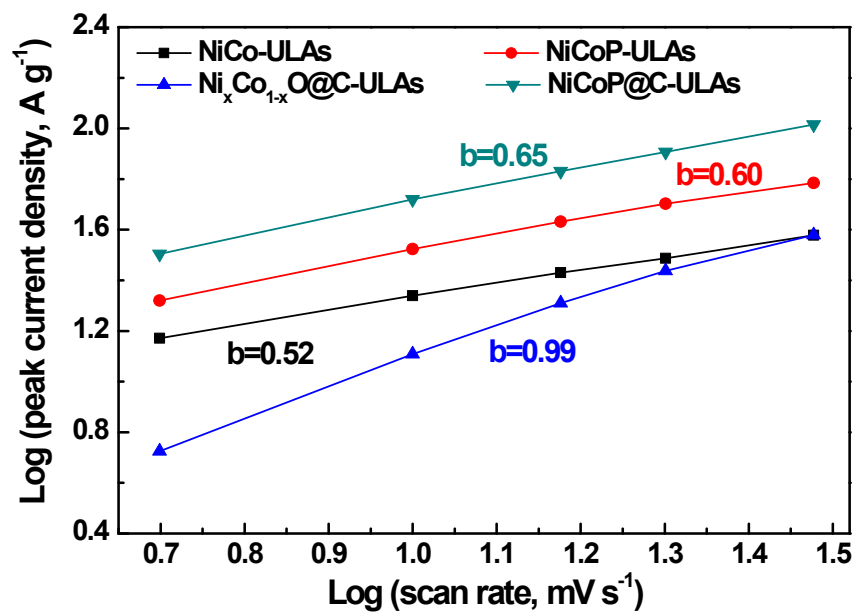

Fig. S12. Logarithm relationship between anodic peak current and scan rate for ULAs series electrodes.

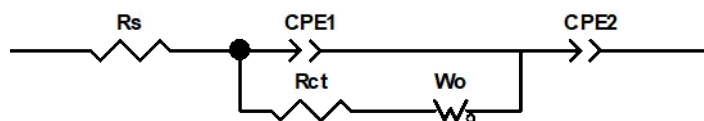

Fig. S13. The equivalent fitting circuit of ULAs series electrodes



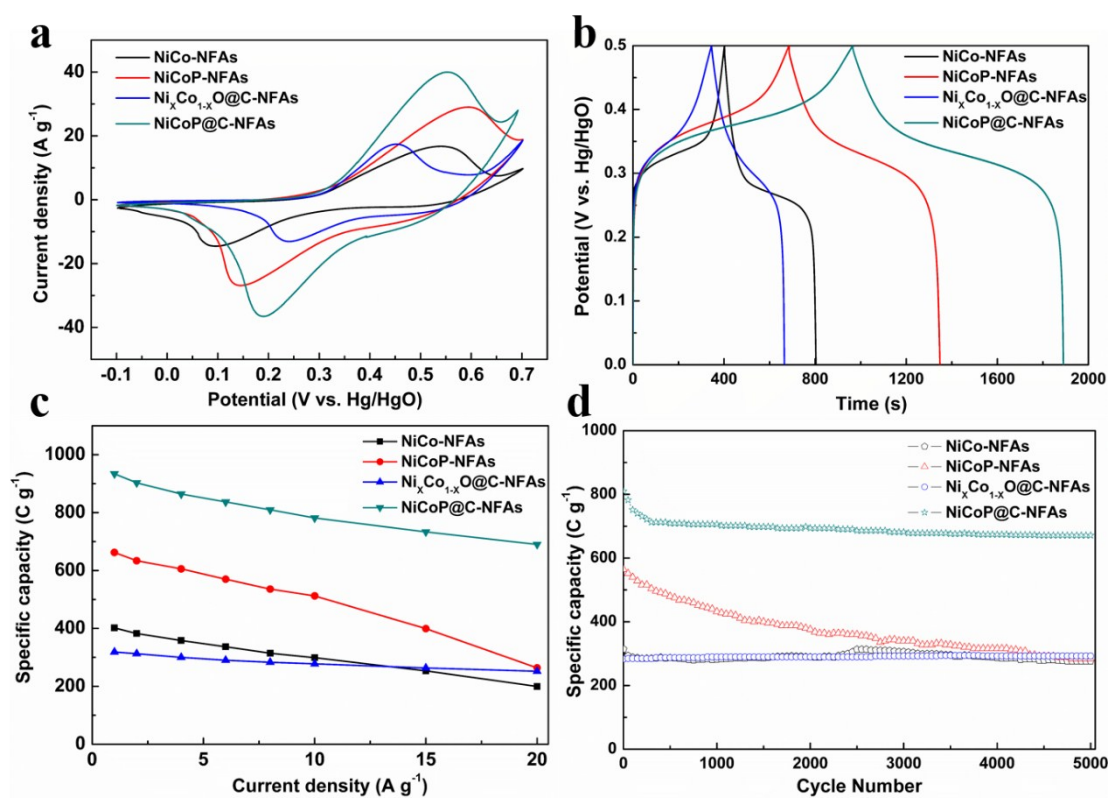

**Fig. S14.** Electrochemical performance of electrodes. (a) CV curves at a scan rate of  $10 \text{ mV s}^{-1}$ , (b) GCD curves at a current density of  $1 \text{ A g}^{-1}$ , (c) the specific capacity at different current densities, and (d) cycling performance at a constant current density of  $8 \text{ A g}^{-1}$ .

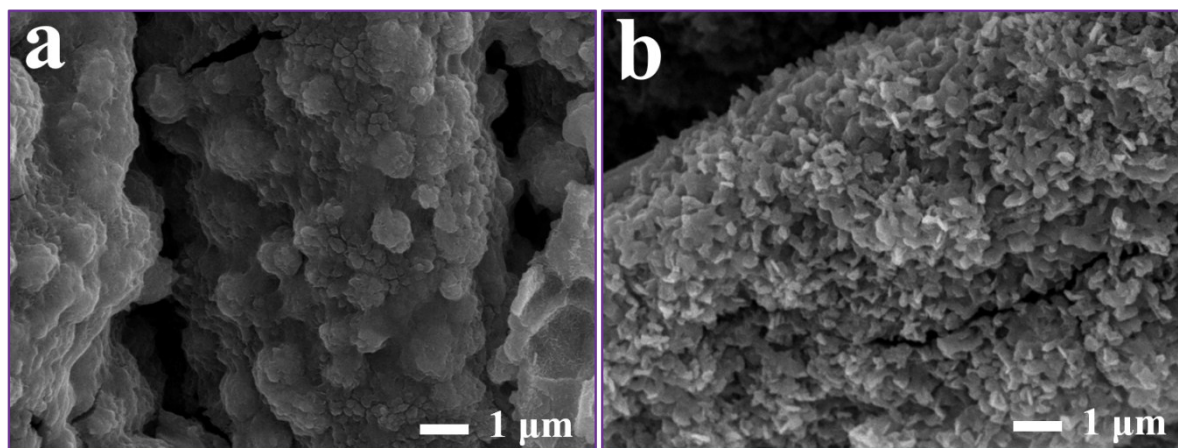

**Fig. S15.** SEM images of NiCoP-ULAs and NiCoP@C-ULAs after cycling for 5000 cycles.

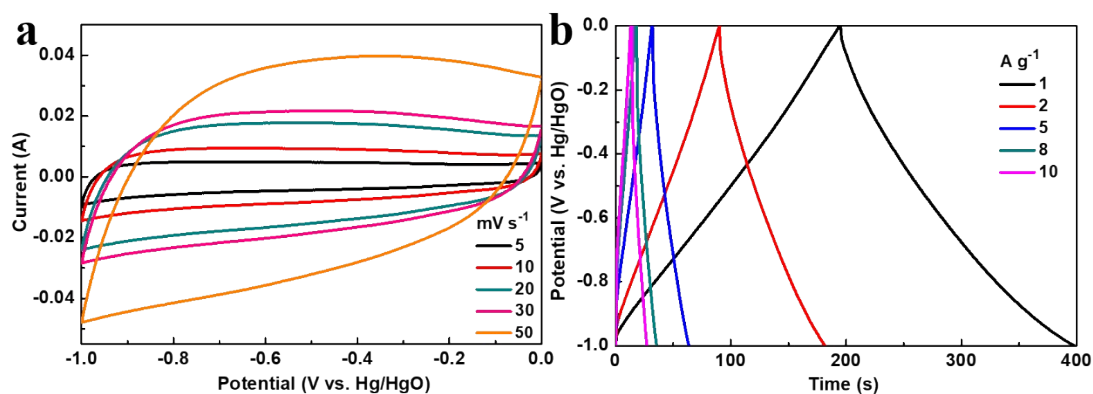

**Fig. S16.** Electrochemical performance of the AC electrode: (a) CV curves at different scan rates from 5 to 50  $\text{mV}\cdot\text{s}^{-1}$ , (b) GCD curves at different current densities from 1 to 10  $\text{A}\cdot\text{g}^{-1}$ .

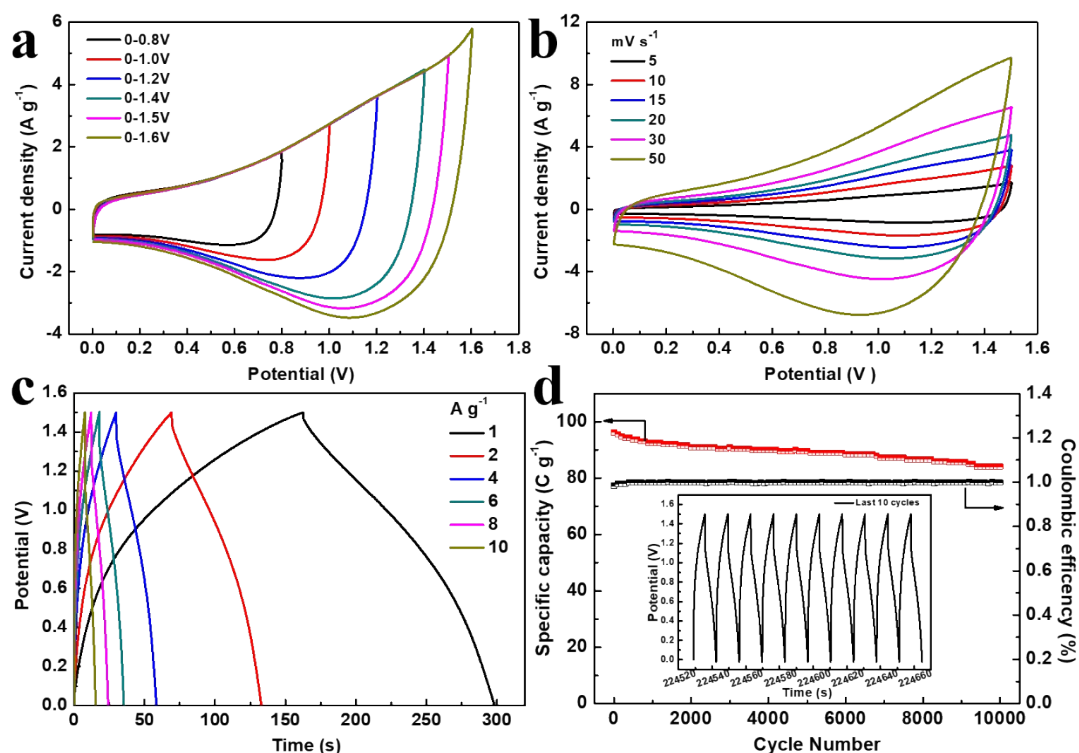

**Fig. S17.** (a) and (b) CV curves of the NiCoP@C-NFAs//AC ASC at different scan rates and voltage windows; (c) GCD curves of the NiCoP@C-NFAs//AC ASC at different current densities; (d) cycling performance of NiCoP@C-NFAs//AC at a current density of 8  $\text{A}\cdot\text{g}^{-1}$ . The inset shows the last 10 cycles of the GCD curves of the ASC device.

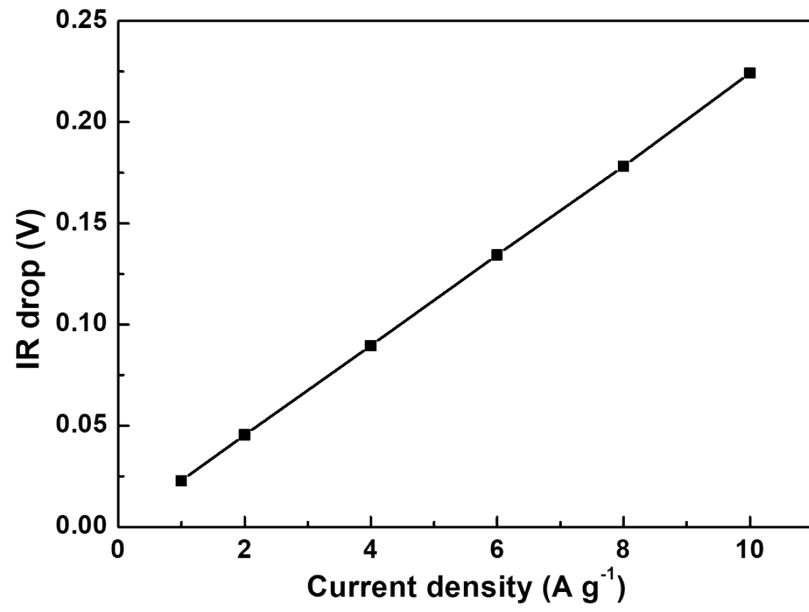

**Fig. S18.** The IR drop of the NiCoP@C-ULAs//AC device at different current densities.

**Table S1.** Textual parameters of the samples.

| Sample       | $S_{\text{BET}}$ ( $\text{m}^2 \text{g}^{-1}$ ) | Average pore size (nm) | Total pore volume ( $\text{cm}^3 \text{g}^{-1}$ ) |
|--------------|-------------------------------------------------|------------------------|---------------------------------------------------|
| NiCo-ULAs    | 37.5                                            | 16.8                   | 0.181                                             |
| NiCoP-ULAs   | 139.1                                           | 9.1                    | 0.306                                             |
| NiCoP@C-ULAs | 201.9                                           | 4.4                    | 0.231                                             |
| NiCo-NFAs    | 31.4                                            | 21.3                   | 0.209                                             |
| NiCoP-NFAs   | 123.7                                           | 11.6                   | 0.312                                             |
| NiCoP@C-NFAs | 174.4                                           | 6.1                    | 0.293                                             |

**Table S2.** The electrochemical performances for as-prepared NFAs and ULAs series samples.

| sample                                          | Specific capacity (C/g) |      |      |      |      |       |       |       | Rate capability | Cycle stability (5000 cycles) |
|-------------------------------------------------|-------------------------|------|------|------|------|-------|-------|-------|-----------------|-------------------------------|
|                                                 | 1A/g                    | 2A/g | 4A/g | 6A/g | 8A/g | 10A/g | 15A/g | 20A/g |                 |                               |
| NiCo-NFAs                                       | 402                     | 382  | 358  | 337  | 314  | 299   | 253   | 199   | 49.5%           | 87.9%                         |
| NiCoP-NFAs                                      | 662                     | 634  | 606  | 570  | 536  | 512   | 399   | 264   | 39.9%           | 50.4%                         |
| $\text{Ni}_x\text{Co}_{1-x}\text{O}$<br>@C-NFAs | 319                     | 313  | 300  | 290  | 283  | 278   | 263   | 252   | 79.0%           | 103.4%                        |
| NiCoP@C-NFAs                                    | 934                     | 903  | 864  | 837  | 810  | 782   | 733   | 690   | 73.9%           | 82.9%                         |
| NiCo-ULAs                                       | 424                     | 402  | 375  | 354  | 341  | 322   | 298   | 272   | 64.2%           | 112.6%                        |
| NiCoP-ULAs                                      | 737                     | 714  | 678  | 651  | 622  | 601   | 543   | 458   | 62.1%           | 55.1%                         |
| $\text{Ni}_x\text{Co}_{1-x}\text{O}$<br>@C-ULAs | 349                     | 343  | 333  | 323  | 315  | 310   | 292   | 273   | 78.2%           | 106.3%                        |
| NiCoP@C-ULAs                                    | 1046                    | 1022 | 982  | 959  | 938  | 923   | 855   | 800   | 76.5%           | 86.3%                         |

**Table S3.** Comparison of our ASCs devices performances with reported literatures

| System                                   | Device window (V) | Energy density (Wh kg <sup>-1</sup> ) | Power density (W kg <sup>-1</sup> ) | Cycle stability (cycles)        | Ref.        |
|------------------------------------------|-------------------|---------------------------------------|-------------------------------------|---------------------------------|-------------|
| AC//NiCoP                                | 0-1.4             | 32                                    | 351                                 | 91.8%<br>(3000)                 | 1           |
| NiCoP/NiCo-OH30//PC                      | 0-1.6             | 34                                    | 775                                 | 92%<br>(1000)                   | 2           |
| AC//CoP                                  | 0-1.4             | 19                                    | 350.8                               | 96.7%<br>(5000)                 | 3           |
| AC//NiP@NiCo <sub>2</sub> O <sub>4</sub> | 0-1.4             | 21                                    | 350                                 | 78.3%<br>(10 000)               | 4           |
| NiCoP@NiCoP//AC                          | 0-1.5             | 34.8                                  | 750                                 | 81.2%<br>(10 000)               | 5           |
| Ni <sub>2</sub> P NS/NF//AC              | 0-1.4             | 26                                    | 337                                 | 91.3%<br>(5000)                 | 6           |
| NiCoP//graphene                          | 0-1.5             | 32.9                                  | 1301                                | 83%<br>(5000)                   | 7           |
| Ni <sub>8</sub> Co <sub>1</sub> P//AC    | 0-1.5             | 22.8                                  | 4320                                | No decay<br>(5000)              | 8           |
| sandwich-like LDH/rGO//rGO               | 0-1.6             | 34.5                                  | 772                                 | 86.7%<br>(10 000)               | 9           |
| Ni-P//AC                                 | 0-1.6             | 29.2                                  | 400                                 | 84.5%<br>(1000)                 | 10          |
| Ni-Co-S//AC                              | 0-1.5             | 21.6                                  | 134.9                               | 90.0%<br>(3000 cycles)          | 11          |
| NiCo <sub>2</sub> O <sub>4</sub> //AC    | 0-1.5             | 27.4                                  | 493.2                               | 79.2%<br>(10 000)               | 12          |
| <b>NiCoP@C-NFAs//AC</b>                  | <b>0-1.5</b>      | <b>32.9</b>                           | <b>871.3</b>                        | <b>87.4%</b><br><b>(10 000)</b> | <b>This</b> |
| <b>NiCoP@C-ULAs//AC</b>                  | <b>0-1.5</b>      | <b>37.1</b>                           | <b>792.8</b>                        | <b>91.4%</b><br><b>(10 000)</b> | <b>work</b> |

### References

- 1 Y.-M. Hu, M.-C. Liu, Y.-X. Hu, Q.-Q. Yang, L.-B. Kong and L. Kang, *Electrochimica Acta*, 2016, 215, 114-125.
- 2 X. Li, H. Wu, A. M. Elshahawy, L. Wang, S. J. Pennycook, C. Guan and J. Wang, *Advanced Functional Materials*, 2018, 28, 1800036.
- 3 Y. Hu, M. Liu, Q. Yang, L. Kong and L. Kang, *Journal of Energy Chemistry*, 2017, 26, 49-55. [4] Li X, Ding R, Yi L, Shi W, Xu Q, Liu E. Mesoporous Ni-P@NiCo<sub>2</sub>O<sub>4</sub> composite materials for high performance aqueous asymmetric supercapacitors. *Electrochimica Acta*. 2016;222:1169-75.
- 4 X. Li, R. Ding, L. Yi, W. Shi, Q. Xu and E. Liu, *Electrochimica Acta*, 2016, 222, 1169-1175.



- 5 Y. Zhu, Q. Zong, Q. Zhang, H. Yang, Q. Wang and H. Wang, *Electrochimica Acta*, 2019, 299, 441-450.
- 6 K. Zhou, W. Zhou, L. Yang, J. Lu, S. Cheng, W. Mai, Z. Tang, L. Li and S. Chen, *Advanced Functional Materials*, 2015, 25, 7530-7538.
- 7 H. Liang, C. Xia, Q. Jiang, A. N. Gandi, U. Schwingenschlögl and H. N. Alshareef, *Nano Energy*, 2017, 35, 331-340.
- 8 R. Ding, X. Li, W. Shi, Q. Xu and E. Liu, *Chemical Engineering Journal*, 2017, 320, 376-388.
- 9 K. Le, Z. Wang, F. Wang, Q. Wang, Q. Shao, V. Murugadoss, S. Wu, W. Liu, J. Liu and Q. Gao, *Dalton Transactions*, 2019, 48.
- 10 D. Wang, L.-B. Kong, M.-C. Liu, W.-B. Zhang, Y.-C. Luo and L. Kang, *Journal of Power Sources*, 2015, 274, 1107-1113.
- 11 Y. Liu, Q. Lu, Z. Huang, S. Sun, B. Yu, U. Evariste, G. Jiang and J. Yao, *Journal of Alloys and Compounds*, 2018, 762, 301-311.
- 12 D. Zhao, H. Fang, A. Umar and W. Xiang, *New Journal of Chemistry*, 2018, 42.
